# Supplementary material for: Die Bedeutung von Kommunikation bei der agilen Systementwicklung
Source: Springer Nature journal article supplement (doi:10.1007/s11576-013-0376-0), 2013-08-14
Supplement: 11576_2013_376_MOESM1_ESM.pdf [file 11576_2013_376_MOESM1_ESM.pdf]

# **Die Bedeutung von Kommunikation bei der agilen Systementwicklung – Aktueller Stand der Forschung**

**Markus Hummel, Christoph Rosenkranz, Roland Holten**

WIRTSCHAFTSINFORMATIK (2013) 55 (5)

Anhang (online verfügbar unter <http://www.wirtschaftsinformatik.de>)

## Anhang A – Detaillierte Informationen zum Suchprozess

### Phase 1 des Suchprozesses

Relevante Erkenntnisse über agile SE können sowohl im Bereich „Software Engineering“ als auch „Information Systems“ gefunden werden. Konsequenterweise sind diese beiden Domänen auch im Suchprozess enthalten. In der ersten Phase des Suchprozesses wurden alle Beiträge und Studien zu agiler SE selektiert, die in den populärsten Quellen aus dem Bereich Software Engineering enthalten sind, die sich mit agiler SE befassen (vgl. auch Dingsøyr et al. 2012). Um die Erkenntnisse der IS-Disziplin einzubeziehen, wurden auch alle Beiträge und Studien zu agiler SE ausgewählt, die in Zeitschriften aus dem „Senior Scholar’s Basket of Journals“ veröffentlicht wurden sowie in den Tagungsbänden der ICIS-Konferenz, die als führende IS-Konferenz gilt (vgl. **Tab. A-1** für eine komplette Liste der berücksichtigten Quellen).

Der folgende Suchstring wurde für die erste Phase des Suchprozesses verwendet: PublicationTitle:“Name” AND ((Title:"Agile" NOT Title:"Manufacturing") OR (Title:"Agility" NOT Title:"Manufacturing") OR Title:"Extreme Programming" OR Title:"Scrum" OR Title:"Pair Programming" OR Abstract:"Extreme Programming" OR Abstract:"Scrum" OR Abstract:"Pair Programming" OR (Abstract:"Agility" AND Abstract:"Development") OR (Abstract:"Agile" AND Abstract:"Development")) OR Keywords:"Flexible Information Systems Development" OR Keywords:"Agile Software Development" OR Keywords:"Agile Information Systems Development"). Dieser generische Suchstring wurde an die jeweilige Datenbank angepasst, in der die betrachtete Quelle im Ganzen veröffentlicht wird, da nicht alle Datenbanken die gleichen Möglichkeiten für das Suchen erlauben.

Nach der initialen Datenerhebung wurden die Titel und Zusammenfassungen der Beiträge und Studien eingehend geprüft und alle Beiträge ausgeschlossen, die keinen Fokus auf agile SE haben. In der ersten Phase des Suchprozesses lag der Fokus explizit auf den Hauptkenntnissen aus denjenigen Quellen, die auf rigoroser wissenschaftlicher Forschung basieren. Dies führte zum Ausschluss von Erfahrungsberichten, Editorials und sehr kurzen Beiträgen. Aus dem gleichen Grund wurden Beiträge aus Quellen zu Bildung und Training (z. B. CSEE&T Konferenz), von nicht-begutachteten (non peer-reviewed) Zeitschriften (z. B. Harvard Business Review) sowie von praxisorientierten Magazinen und Journalen (z. B. IEEE Software, IEEE Computer oder Communications of the ACM) vermieden.

**Tab. A-1** enthält die gesamte Liste der Zeitschriften und Konferenztagungsbände, die in der ersten Phase des Suchprozesses einbezogen wurden. Die Anzahl der selektierten Beiträge auf Basis der oben genannten Kriterien sowie die Anzahl der Beiträge mit Erkenntnissen zu Kommunikation und agiler SE wird ebenfalls angegeben.

**Tab. A-1** Enthaltene Quellen und Anzahl ausgewählter Beiträge

|                                           | Suchergebnisse | Selektierte Beiträge | Erkenntnisse über Kommunikation | Letzte inkludierte Ausgabe |
|-------------------------------------------|----------------|----------------------|---------------------------------|----------------------------|
| <b>Software-Engineering-Quellen:</b>      | 754            | 444                  | 138                             |                            |
| Empirical Software Engineering            | 17             | 14                   | 7                               | Apr 2013                   |
| IEEE Transactions on Software Engineering | 9              | 5                    | 1                               | Vol. 2 2013                |
| IET Software                              | 6              | 5                    | 0                               | Dez 2012                   |
| Information and Software Technology       | 31             | 27                   | 6                               | Mär 2013                   |
| Journal of Systems and Software           | 31             | 24                   | 10                              | Mär 2013                   |
| Journal of Systems Architecture           | 5              | 1                    | 0                               | Jan 2013                   |
| Agile Conference                          | 92             | 85                   | 31                              | 2012                       |
| ESEM                                      | 25             | 11                   | 4                               | 2012                       |
| EuroMicro                                 | 37             | 21                   | 5                               | 2012                       |
| EuroSPI                                   | 18             | 15                   | 8                               | 2012                       |
| ICGSE                                     | 31             | 13                   | 11                              | 2012                       |
| IFIP Conferences                          | 143            | 14                   | 1                               | 2012                       |
| ICSE                                      | 69             | 15                   | 4                               | 2012                       |
| LESS                                      | 5              | 5                    | 0                               | 2010                       |
| PROFES                                    | 61             | 35                   | 8                               | 2012                       |
| XP                                        | 174            | 153                  | 42                              | 2012                       |
| <b>Information-Systems-Quellen:</b>       | 80             | 38                   | 20                              |                            |
| European Journal of Information Systems   | 17             | 10                   | 5                               | Jan 2013                   |
| Information Systems Journal               | 8              | 6                    | 4                               | Mär 2013                   |
| Information Systems Research              | 8              | 8                    | 5                               | Dez 2012                   |
| Journal of Information Technology         | 12             | 0                    | 0                               | Dez 2012                   |
| Journal of Management Information Systems | 3              | 2                    | 1                               | Herbst<br>2012             |
| Journal of Strategic Information Systems  | 0              | 0                    | 0                               | Dez 2012                   |
| Journal of the AIS                        | 2              | 0                    | 0                               | Jan 2013                   |
| MIS Quarterly                             | 5              | 2                    | 1                               | Mär 2013                   |
| ICIS                                      | 25             | 10                   | 4                               | 2012                       |
| <b>Gesamtanzahl Beiträge:</b>             | <b>834</b>     | <b>482</b>           | <b>158</b>                      |                            |

### Phase 2 des Suchprozesses

Um sicherzustellen, dass der Literaturüberblick auf einer repräsentativen Sammlung von empirischen Kenntnissen über agile SE und Kommunikation basiert, wurden anschließend die initialen Ergebnisse erweitert, indem eine Datenbanksuche in den relevantesten Datenbanken der Software Engineering- und Information Systems-Disziplinen durchgeführt wurden. Hierzu wurde der folgende Suchstring benutzt: (Title:"communication" OR Abstract:"communication" OR Keywords:"communication") AND (search string of stage 1 without PublicationTitle). Der genaue Suchstring wurde wiederum an die jeweilige Datenbank angepasst. In der zweiten Phase des Suchprozesses wurden explizit alle relevanten Erkenntnisse zu Kommunikation und agiler SE untersucht, inklusive der Erkenntnisse aus Erfahrungsberichten, Kurzbeiträgen und zuvor vermiedenen Quellen (Quellen zu Bildung und Training,

nicht begutachtete Zeitschriften und praxisorientierte Magazine und Journals). Studien, die nicht auf agile SE fokussieren oder die keine Erkenntnisse zu Kommunikation enthalten, wurden von der Analyse ausgeschlossen.

**Tab. A-2** präsentiert die Datenbanken sowie die Anzahl der Beiträge, die kommunikationsbezogene Erkenntnisse über agile SE enthalten.

**Tab. A-2** Ergebnisse der Datenbanksuche

| <b>Datenbank</b>                    | <b>Anzahl Suchergebnisse</b> |
|-------------------------------------|------------------------------|
| ACM                                 | 74                           |
| AIS                                 | 14                           |
| EbscoHost                           | 204                          |
| IEEE                                | 456                          |
| ScienceDirect                       | 38                           |
| SpringerLink                        | 181                          |
| Web of Science                      | 86                           |
| Wiley                               | 33                           |
| <b>Gesamtanzahl an Paper:</b>       | <b>1086</b>                  |
| <b>Zusätzliche relevante Paper:</b> | <b>144</b>                   |

Zusammenfassend ergab die Datenbanksuche 144 zusätzliche Beiträge, die Erkenntnisse zu agiler SE und Kommunikation enthalten. Aufgrund vieler Duplikate während der Datenbanksuche wird nur die Gesamtzahl der relevanten Beiträge der Datenbanksuche angegeben. Zusätzlich wurden 31 Studien im Literaturüberblick berücksichtigt, die sich aus der Rückwärtssuche ergaben (Webster and Watson 2002).

Die Kombination von Phase 1 und Phase 2 des Suchprozesses ergibt 333 Beiträge, die im Literaturüberblick enthalten sind. Eine Gesamtliste der enthaltenen Studien ist im Online-Anhang B („Full\_List\_of\_Papers.xlsx“) zu finden.
